## **Staff experiences and perspectives of delivering an integrated child health and social care service in community settings: A qualitative exploration using the SELFIE framework**

**Litchfield I<sup>1</sup>, Harper L<sup>1</sup>, Abbas S<sup>2</sup>, Dutton F<sup>3</sup>, Wolhuter C<sup>4</sup>, Bird C<sup>5</sup>**

**1 Department of Applied Health Research, University of Birmingham, UK**

**2 Clinical Research Department, Primary Health Care Corporation, Qatar**

**3 Small Heath Medical Practice, Birmingham, UK**

**4 Green Square Accord, UK**

**5 Birmingham Women's and Children's NHS Foundation Trust, Birmingham, UK**

### *Introduction*

It's suggested that integrated care is well-placed to address the prevalence of chronic conditions, obesity, and mental ill health in children and young people living in minoritized and economically-marginalised communities in high-income countries. This work describes staff perspectives of delivering an integrated place-based service providing multidisciplinary clinical care and early intervention social support to children and young people in an ethnically diverse and economically disadvantaged community in the UK.

### *Materials and Methods,*

We conducted a qualitative exploration of the experiences of staff delivering the service and used a directed content analysis to populate and present the results within the Sustainable integrated chronic care model for multi-morbidity: delivery, financing, and performance

**NOTE: This preprint reports new research that has not been certified by peer review and should not be used to guide clinical practice.**

(SELFIE) framework. The first part of the analysis presented here focusses on the domain of *Service delivery*, relating to the availability and access of care.

### *Results*

A total of 14 staff were interviewed including clinicians from primary and secondary care, social care providers, local voluntary groups, and school-based family mentors. Staff described at a *Micro*- level how the service increased engagement of families and facilitated referral to social support and preventative care; at a *Meso*- level the benefits of collocation, collaborative working, and community outreach were described. Finally at the *Macro* level, improvements to the access and availability of appropriate care were observed despite limited engagement by the local care system.

### *Conclusions*

The pilot appeared to deliver multiple benefits for both patients and staff and the broader health economy particularly through collocating health care and social support. However, to implement truly integrated care, greater institutional commitment and leadership are needed.

**Keywords:** Integrated care; Health inequalities; Primary care; Children and young people; Community engagement

## Introduction

Children, young people (CYP) and their families living in high income countries face mounting challenges to their health and well-being, as the prevalence of chronic conditions, obesity, and mental ill health continues to increase (1). These challenges are exacerbated in underserved populations i.e., minoritized, and economically (and culturally) marginalized communities (2, 3), by a range of socio-economic and cultural pressures that inhibit and utilisation of primary or preventative health care services (4-7). These social determinants of health (SDOH) include income, housing, and food insecurity and medical institutions in many high income countries are beginning to fully understand the importance of their being addressed (8, 9). To this end policymakers and commissioners in multiple health systems are encouraging collaboration between health services, social care providers, local authorities, voluntary, community and faith sector (VCFS) groups and other agencies to improve health and reduce health inequalities (10-12).

New models of integrated health and social care are emerging in Australia (13), North America (14, 15), and Europe (16). In the UK National Health Service England (NHSE) has been reorganised under the Health and Care Act 2022 to facilitate closer collaboration between health and social care organisations. (17, 18). This includes prioritizing and funding localised service delivery that integrates several strands of health and social care and places a greater emphasis on public and preventative health (10, 19-25).

One such example is the Sparkbrook Children’s Zone (SCZ), a pilot clinic where General practitioners, family support workers, mental health outreach, dentists and paediatricians work side-by-side in a low-income area of Birmingham to deliver place-based care with preventive health. The SCZ is described in a service blueprint differentiating between the visible elements involving the contact between patients and providers and the invisible processes and infrastructure that support its delivery (see Figure 1). Its intention is to treat and manage acute and chronic health care alongside the necessary social support for CYP and their families that can help mitigate the social determinants of ill-health (26, 27).

Despite the introduction of pilot programmes such as the SCZ and widespread policy initiatives encouraging localised integrated care there is little high quality evidence for children to suggest they increase accessibility to health and social care (28); which integrated models are most effective (29-31) and ultimately improve health equity (31, 32). The work presented here describes staff experiences from a range of health and social care organisations as well as the voluntary and community sector on the delivery and reception of the SCZ. The findings are presented within an *a priori* framework designed to examine and support integrated care offering structured insight into the facilitators, barriers, and benefits of delivering integrated place-based health and social care in the UK.

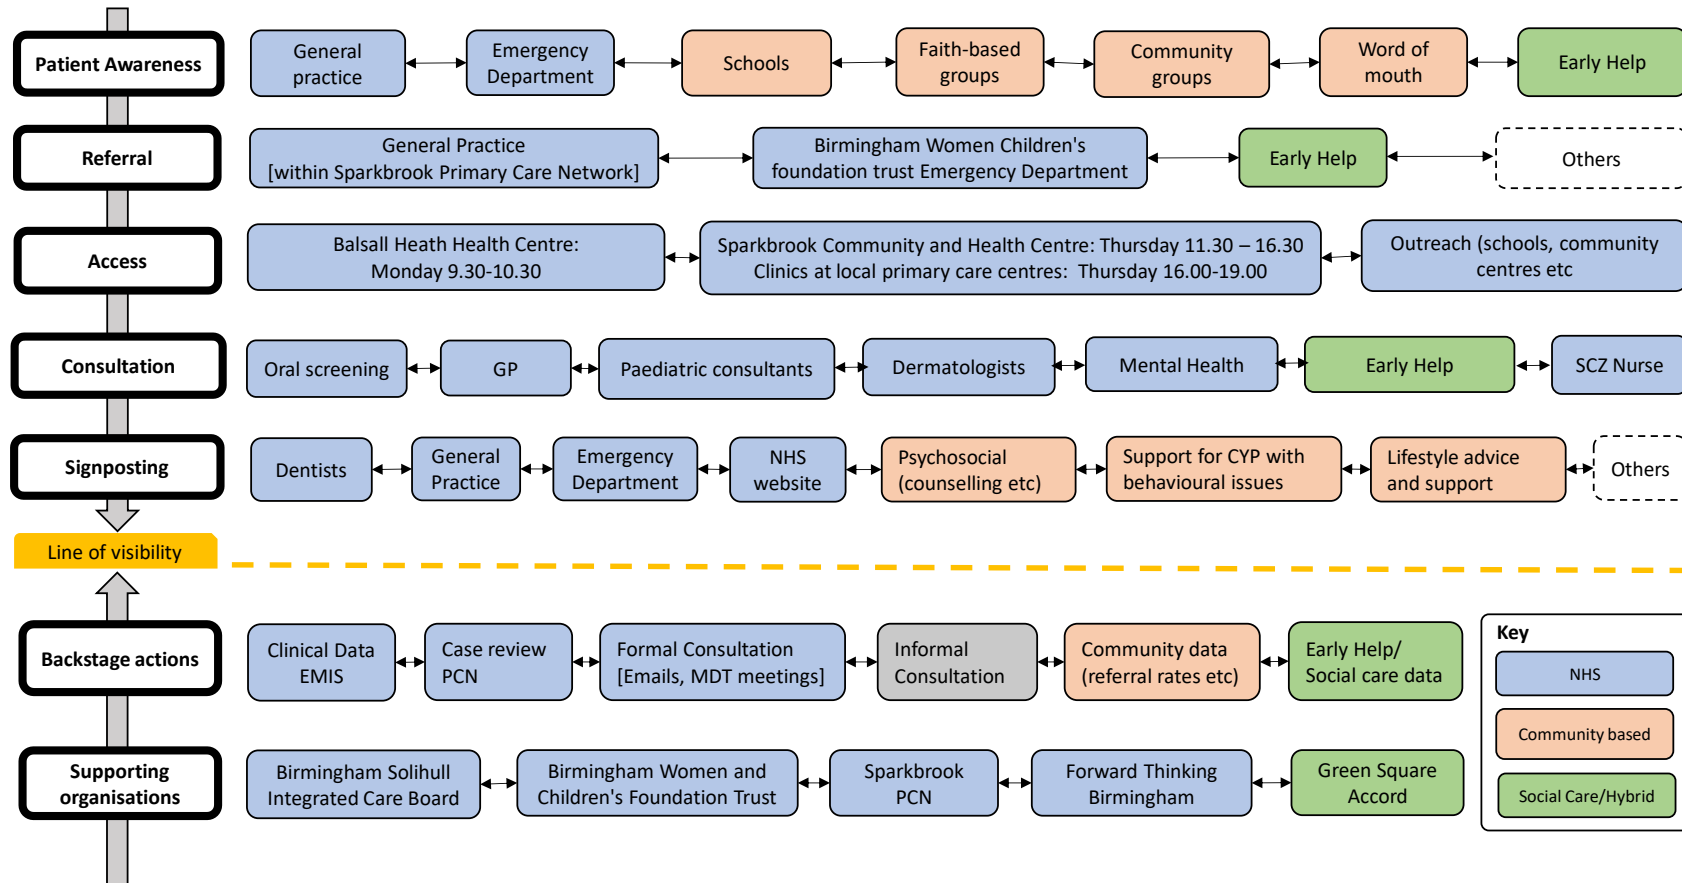

Figure 1: Service blueprint outlining Sparkbrook Children's Zone integrated service

## Methods

### *Study design*

The work is qualitative and consists of a series of semi-structured interviews with a range of staff responsible for delivering the service. To provide a structured exploration of this complex integrated care model we used the “*Sustainable intEgrated chronic care modeLs for multi-morbidity: delivery, Financing, and performance*” developed through a Horizon2020 funded EU initiative incorporating eight organisations from across Europe coordinated by the Netherlands ([www.selfie2020.eu](http://www.selfie2020.eu)). The SELFIE framework consists of a number of coordination concepts from micro- through to macro-levels incorporated within six key components (see Supplementary File 1) informed by the six domains of the World Health Organisation’s interpretation of healthcare systems (33). The work presented here specifically explores the domain of *Service delivery*, relating to the availability and access of care (see Table 2) (34). This allowed for a in-depth analysis of the influences on the delivery of the service. The data exploring the infrastructural and organisational factors underpinning the delivery of the SCZ are explored in our sister paper including the SELFIE domains of *Leadership & governance, Workforce, and Financing* [unpublished].

### *Population/recruitment*

The SCZ is based in Sparkbrook & Balsall Heath East ward in Birmingham a large and diverse city in the UK’s midlands. It is the second most populous ward in the city, has the second highest level of deprivation and a superdiverse, young population with high rates of unemployment infant mortality in England. It is also disproportionately affected by childhood

obesity, child criminal and sexual exploitation, poor housing, chronic disease, and high levels of universal needs around housing, food, clothing, sanitary products, and essential supplies (35).

All staff involved in developing, managing and delivering the SCZ were eligible for inclusion. They were approached by [1st author] and [4<sup>th</sup> author] who were unknown to potential participants, all were supplied with a participant information sheet, opportunity to ask questions and ultimately provided informed consent before the interview commenced. We aimed to carry out interviews with 5-6 service providers from each organisation (including service leads, those actively delivering the service and administrative/support staff) to reach a total of 25 interview sufficient to provide a rich and representative data set (36).

#### *Data Collection:*

Semi-structured interviews were conducted online (via Teams or Zoom), face-to-face in a room at the clinic, or via telephone by [First author] and [Third author]. They are experienced qualitative researchers who were previously unknown to the participants. Informed consent was required before the commencement of either. The topic guide was informed by the existing literature and covered a range of themes including experiences of the service, barriers and facilitators to engaging with the SCZ, and recommendations for further and future development (please see Supplementary File 1: Summary topic guide). Audio recordings were transcribed verbatim by an approved third-party transcription service and the data were managed using nVivo vers 12.

### *Data analysis:*

Two authors [first author] and [third author] independently coded each transcript fitting the data within each of the six themes of the SELFIE framework using the best principles of directed content analysis (37). This included the identification and inclusion of emerging domains, constructs or sub-constructs (38). Any differences in coding were discussed and a consensus arrived at. The final allocation of the data within the coding framework was agreed by all authors. To confirm, the data coded into the “Service Delivery” domain are presented here.

## **Results**

### **Characteristics of participants**

We interviewed 14 participants over 13 interviews (two participants were interviewed at the same time). The interview lasted between 18 and 70 minutes. Of the 14 participants five were from primary care, three secondary care, two from social support, one that worked in local education, and one for a children’s charity.



**Table 1 Characteristics of participants**

| <i>Participant ID</i> | <i>Sector</i>          | <i>Role/Job Title</i> |
|-----------------------|------------------------|-----------------------|
| 01                    | Secondary care         | Senior staff          |
| 02                    | Education              | Family mentor         |
| 03                    | Primary Care           | GP                    |
| 04                    | Secondary Care         | Consultant            |
| 05                    | Secondary Care         | Consultant            |
| 06                    | Primary Care           | GP                    |
| 07                    | Social support         | Family Support        |
| 08                    | Integrated care system | Operations manager    |
| 09                    | Primary care           | Health Care Associate |
| 10                    | Primary care           | Health Care Associate |
| 11                    | Children's charity     | Service lead          |
| 12                    | Primary care           | GP                    |
| 13                    | Social support         | Project manager       |
| 14                    | Social support         | Service lead          |

### **Qualitative data**

Below we present our findings within each of the relevant constructs within the Service Delivery domain at Micro -, Meso-, and Macro- levels. They are described alongside exemplar quotes identified by participant ID, and Job role. These findings are summarised in Table 2.

**Table 2 Summary of SELFIE informed analytical framework and emerging themes (34)**

| <b>Domain</b>    | <b>Definition</b>                                                                                                            | <b>Level</b> | <b>Construct</b>                          | <b>Emerging themes</b>                                                                                                                                                                                          |
|------------------|------------------------------------------------------------------------------------------------------------------------------|--------------|-------------------------------------------|-----------------------------------------------------------------------------------------------------------------------------------------------------------------------------------------------------------------|
| Service Delivery | The provision of equitable and timely access to safe and appropriate care (including preventative health and social support) | <i>Micro</i> | Caregiver involvement                     | <ul style="list-style-type: none"> <li>• Developing trust with patients</li> </ul>                                                                                                                              |
|                  |                                                                                                                              |              | Pro-active/preventative health            | <ul style="list-style-type: none"> <li>• Health promotion</li> <li>• Referrals to preventative health</li> </ul>                                                                                                |
|                  |                                                                                                                              |              | Tailored/person centred care              | <ul style="list-style-type: none"> <li>• Health literacy</li> <li>• Sensitive to individual needs</li> </ul>                                                                                                    |
|                  |                                                                                                                              | <i>Meso</i>  | Structural and organisational integration | <ul style="list-style-type: none"> <li>• Multi-agency working (Incorporating schools, children’s services, and social care)</li> <li>• Developing links with community groups</li> <li>• Co-location</li> </ul> |
|                  |                                                                                                                              | <i>Macro</i> | Policies to integrate care                | <ul style="list-style-type: none"> <li>• Lack of engagement of local health authority</li> <li>• Support local authority’s priorities</li> </ul>                                                                |
|                  |                                                                                                                              |              | Service availability and access           | <ul style="list-style-type: none"> <li>• Reaching target populations</li> <li>• Streamlined referral</li> <li>• Integrating interpretation</li> </ul>                                                           |

## **Micro-**

### *Caregiver involvement*

Clinicians and social support providers understood the importance of fostering trust and developing a collaborative alliance with parents. This included the understanding that (frequently attending) parents often needed time to talk about the wider challenges they face:

“I think sometimes the patients present to medical practitioners because they don’t always feel listened to, and they present with symptoms that really don’t need medical attention...they then come to Early Help, we have a long conversation with them, and they go away feeling better because they actually feel like they’ve had their problems and issues listened to...”

P07, Social Support, Family Support

### *Pro-active/Preventative health*

Clinicians in the SCZ seized the opportunity to engage parents in health promotion by using the responses to a wider set of contextual questions to link to patients directly with preventative health offers:

“because the clinicians are looking more broadly at health and wellbeing of that child - in its place, in the family, and in the community... the family is learning things that maybe it didn’t even know were available...[SCZ] is able to say, “Oh, this is something that you could do now, it could help your child lose weight, this could help your child brush his teeth better...”

P01, Secondary Care, Consultant

*Tailored and personalised care*

The way in which the SCZ was designed meant that consultations were longer, and clinicians were able to understand and address the specific needs of individual families:

“...we can also educate our parents of how to help themselves so they become more resilient, and have an understanding of how best to parent their child, care for their child, meet their child’s needs, where to gain the support when it is needed, and break down those barriers as well.”

P07, Social Support, Family Support

**Meso-**

*Structural and organisational integration*

Staff described how offering joined-up health and social support allowed them to more holistically address the needs of the patients:

“...families present to GPs at the children’s zone, but often they’re coming to have symptoms treated, where actually the underlying cause isn’t always medical, sometimes it’s more of an Early Help need...if we can address both of those things, treat the symptoms and hopefully the cause, it will result in less presentations in the future.”

P07, Social Support, Family Support

A significant partner in the SCZ's attempt to reach target populations were local schools. This included the SCZ both proactively arranging sessions on a predesignated issue and responding to requests from schools to meet families they were concerned about:

"We will contact a school, and then we'll say, "Can we come in and talk about picky eating?" And then we'll say... or diabetes, or some kind of health thing, and then they'll pick their families, so they know, or more successfully schools will then say, "We're seeing there's a really... there's low attendance with some of our children, and we don't really know why, they say it's health related but we don't really know why, can you come in?"

P13, Social Support, Project Manager

Not all of the organisational integration was formal and the location of the service within the communities they serve helped create informal networks with local groups based on the benefits of establishing relationships in person:

"...we've done work with the youth centre, which is about two/three minutes' walk away, and so we've been able to share the stuff that we know about the [SCZ] with the youth centre, and it just all starts to make... create a professional network. It's not formal, it doesn't have to meet round a Teams meeting, but it's just being in a community and in a space, and learning about what's on offer..."

P11, Children's Charity, Service Lead

The benefits of collocating organisations and members of the multi-disciplinary team were reported by patients who appreciated the ability of the SCZ to address multiple issues in one visit:

“We had [secondary care consultant] ... walk a family over to the drop-in [mental health drop-in clinic], and they were given support there and then, and mum and child were absolutely amazed that they could from having a meeting that was scheduled that week with a GP to having attended that, and within - I think it was an hour - having had the intervention, that the GP has signposted to. I think that slightly blew mum’s mind...being like ‘That doesn’t normally happen! How is this...?’”

P11, Children’s Charity, Service Lead

The colocation also enabled staff to deliver better care by being more aware of what each service provided and being able to consult with colleagues from other settings in-person:

“I get to discuss them [the patients] with the consultant who’s just next door ...we don’t really get that opportunity as GPs, we sit in our own room, doors are closed, we have the patients come in, we want to get advice we speak to a paediatrician over the phone. It’s not the same as actually discussing with someone who’s right there physically, who can actually walk into my room and see my patient in front of me. It’s completely different, it’s an invaluable experience... you can’t replicate that experience over a phone call”

P12, Primary Care, GP

## Macro-

### *Policies to integrate services*

The original idea for the SCZ came from emergency department clinicians at the local children's hospital attempting to address the disproportionate numbers of parents presenting from the most deprived wards in the city. Despite its meeting key priorities of the local health authority (in the UK these are known as Integrated Care Service (ICS)) the same clinicians continued to be responsible for the ongoing management of the service including securing funding:

“...I feel like the leadership for this has been largely on the backs of the doctors running the service...this is a service that reduces health inequalities, this is the priority for the ICS...the ICS has not enabled them in the way that if this was a real priority you'd see more leadership I think from within the ICS for developing this.”

P01, Secondary Care, Consultant

It was understood that the SCZ would also help inform the local authority's approach to developing cross-sector support for underserved families:

“In two or three ways this model is essentially very good. One is the [council] is thinking about family hubs so this model is really working on family hub level, and it is doing exactly what family hubs are supposed to do, bring a range of services together in one area. So this model could be a good pilot, an idea for a family hub, how health and non-health actually works together.”

P03, Primary Care, General Practitioner

*Service availability and access*

Local schools were understood to be a valuable means of accessing marginalised populations that otherwise faced multiple barriers to engaging with health care:

“...at our school we’ve got a lot of Arabic Yemeni, we’ve got a recent migration of parents from Somalia and Nigeria. So it’s a lot about maybe targeted groups such as parents who may not have English as their first language, and may be hesitant about going to the doctors...these initiatives... can really help to reach out to our families who may be more deprived or isolated within society.”

P02, Education, Family Mentor

The further engagement of these families was supported by holding more informal joint consultations in the familiar, non-clinical school environment:

“The reason why [parents attend] is because... a) it’s in a relaxed environment, it was a coffee morning, so it wasn’t a doctor’s surgery, it wasn’t an intimidating environment, it was a safe known environment to parents, and also it was done in a bit of a group discussion. ... it was nice the fact that they were actually able to speak to the doctor and if they didn’t understand anything Doctor [GP’s name] was brilliant at explaining - for example there was something about birth marks...”

P02, Education, Family Mentor



- s

The colocation of social support and clinical care meant parents could not only access the clinical care for which they were referred but also social support without the associated stigma:

“...and that is critical for Sparkbrook Children’s Zone, because there’s no shame in taking your children to the doctor. That is... going to the doctor is a safe and legitimate activity. So, I think that’s even though not everybody going to the doctor needs support, there is a way of... that is one of the benefits.”

P14, Social support, Service Lead

### Streamlined referral processes

The integration of the referral process between the various elements of the service made it easier for families with competing priorities that might otherwise be unable to make additional appointments and further visits:

“I don’t need to do a long several page referral into Early Help. As a doctor I’m saying, “There you go, you can just go next door”...that’s a service that the family would have been able to access by picking up the phone... I think we know that families’ motivation and resilience can be so low when they are struggling with lots and lots of different things in your life... that they’re not going to pick up the phone.”

P04, Secondary care, Consultant

### *Interpreters as a routine part of the service*

Staff valued the ability of the service to provide the majority of parents and patients with interpreters and the opportunity to ensure that they understood what was happening as they were referred between services within the SCZ:

“There are obviously some language needs, which we have met through our telephone interpreting service, which has been really good...Some of the [referring] GP practices have been really good at booking in advance interpreters for patients and their parents and carers so that they’ve got no language barrier when they come to clinic, which is especially excellent. It doesn’t always happen, but we’ve always got a service that will be able to translate, which is really nice.”

P05, Secondary care, Consultant

## **Discussion**

### **General findings**

The SCZ is one of the first integrated health and social care services for CYP to be delivered in the UK. Its novel combination of primary, secondary care, social support and allied children’s services and preventative health offers was developed to provide a more holistic care service capable of addressing the social determinants of health. Using the service delivery domain of the SELFIE framework proved a valuable means of unpicking the various benefits, barriers and facilitators of the delivered integrated service. At *Micro* level these included increased engagement of families, improved referral to preventative care services, and personalised health care; at *Meso* level the benefits of collocation, collaborative working and community

outreach were described. Finally at the *Macro* level, the lack of engagement of the local care system was observed as were improvements to the access and availability of health and social care.

## **Specific findings**

### **Micro-**

#### *Caregiver involvement*

It is acknowledged that the voices of service users should be, but are not always, heard when decisions are made about their or their child's medical care (39, 40). Staff in the SCZ described how they consciously took time to explore individual patients and their family's context and concerns, to better understand needs, wishes and feelings and gain parental consent, a key element for Early Help and service coproduction, and enshrined in the Care Act (2014)(41). Existing evidence describes how exhibiting such an interest in, and understanding of, patients' cultural background, primary language, and –cultural and faith practices, can help establish trust in the service particularly amongst those previously suspicious of mainstream healthcare including underserved populations (10, 42-45).

#### *Pro-active/preventative health*

The aim of policymakers everywhere is to implement primary care that supports communities to increase control over the factors that influence health (46, 47). However exerting this control is inhibited in underserved populations by institutional, societal, and environmental

barriers (48) and by the GPs responsible reporting a lack of confidence and time in delivering such care and support (49, 50). Despite these issues the promotion of healthy living and preventative care appeared a successful element of the SCZ where staff described how their increased understanding of patients meant they could directly refer patients to the most appropriate programmes.

Oral health was another key offer of the SCZ particularly important in a national health service where many children struggle to access the dental care they need (51). The effectiveness of providing community routes of access to oral health care is recognised (52) particularly amongst CYP(53) and the SCZ was able to link CYP to oral care through their partners in neighbourhood schools, another recognised route to accessing oral health care (54).

#### *Tailored/personalised care*

Clinicians described how they took the time to understand not only the individual but also community context, accommodating these cultural needs, preferences and broader social and cultural values is an integral element in successfully delivering personalised care (55, 56). The focus on the relationship with the patient (and family) and the additional discretionary effort displayed by clinicians in the SCZ is also known to support personalised care (40) alongside improved compliance and clinical outcomes (57, 58).

#### **Meso-**

## *Structural and organisational integration*

### Multi-agency working (Incorporating preventative children's services, and social care)

Staff described how the multi-disciplinarity of the SCZ meant they were better able to address complex health problems and the structural challenges and social determinants of individual and population health, as witnessed in similar service offers elsewhere (47, 59-61). These include an increase in inter-agency referrals (13) improved food security (14) access to care and patient experience, and greater confidence and trust from CYP and their families (15, 29, 62, 63).

### School outreach

School-based outreach appeared a particularly useful means of the SCZ engaging more marginalised families supported by the non-clinical familiar environment for group consultations, a format recommended by NHSE for empowering disenfranchised patients (64). In the UK, the Department for Education flagged the importance of schools being a safe and reliable point of access for health and social care, and engaging families and communities in the health and well-being of their children (65-68). More broadly the potential of schools to serve youth in low-income, underserved communities is recognised by WHO (69) and schools are regularly used in the United States and other High-Income countries to engage families and provide support for mental health, chronic conditions, and preventative healthcare including physical activity and oral hygiene (70-75).

## Collaboration with local communities /networking

Participants described how delivering care in localised facilities enabled a better understanding of active community groups and initiatives. In the UK there has been a renewed push to strengthen place-based partnership working as part of the integrational reforms associated with the 2022 Health and Care Act (76, 77). Working with local communities ensures health and social care services are context-specific (78), accommodating community cultural and social norms (79) and helping to build trust within the community (77, 80, 81).

## Co-location

Staff described the benefits to teamwork and professional development of sharing a space with colleagues. The literature describes how collocating multi-disciplinary teams promotes efficient teamwork and collaborative communication (82-85). Other benefits of colocation reported in the SCZ are its ability to promote recognition of other professionals' skills and contribution (59, 86) and reinforce shared beliefs and values (87).

## **Macro-**

### *Policies to integrate care*

The NHS Health and Care Act of 2022 and a myriad of policies in advance of that were developed to deliver a more unified health and social care service capable of addressing the social determinants of health (SDoH) (8). In the UK the introduction of integrated care systems

were intended to drive true integration however, participants reported a lack of ownership and leadership by the local integrated care system (88). Not only in Birmingham but nationally, health and social care systems have been under immense financial pressure, with the resulting lack of capacity precluding prolonged institutional support to the pilot. This reluctance of the regional system to actively engage with integrated health and social care has been witnessed previously and looks set to continue in the absence of concerted evidence and realistic funding (12, 60, 89). Within this context CYP are further disproportionately disadvantaged by inequitable representation and attention in service design and resourcing.

#### *Streamlining referral processes*

Typical referral process can challenge underserved populations due to a range of personal, community, and policy-level factors (90, 91). This is particularly true for referrals designed to address unmet social needs where issues associated with competing life priorities, such as work, chronic disease and caring responsibilities are manifest (92, 93). There have been recent calls to improve pathways connecting citizens with unmet needs to social resources (94, 95) and the SCZ's multi-disciplinary colocation improved attendance by enabling same day/location referrals. There is evidence elsewhere that describes how streamlined referrals and those associated with a shorter follow-up period significantly improve connection rates (39, 90), including for CYP (96).

#### *Translation/interpreter services*

The value and impact of interpreters in improving the care and outcomes for culturally and linguistically diverse populations observed in the SCZ has been widely recognised previously (97, 98) including for children (99). In the UK the NHS has released guidance for the commission of interpreting and translation services in primary care (100) with opportunities to integrate interpreting more formally into the navigator role (101).

### *Strengths and limitations*

The SELFIE framework proved a valuable tool in unpicking the experiences of delivering a collocated cross-sector community-based service and we used best practice in directed content analysis. The number of interviews (n=14) is in keeping with consensual theory where experts asked about a defined area where “experts” with shared knowledge about the topic under discussion are more likely to exhibit common values (102). Not every element of service delivery described in the SELFIE’s ‘Service Delivery’ domain were identified in our data set though they may be relevant to other integrated service offers. Participants were representative of the organisations involved in delivering the service and we also plan to interview service users (CYP and their families) to understand their experiences of the new service.

### **Conclusions**

Integrated health and social care is considered key to the future maintenance of health in the UK and beyond. This in-depth exploration of the SCZ pilot service appears to demonstrate multiple benefits of a collocated place-based integrated service for CYP. Participants believe



the pilot has brought notable benefits to CYP through linking social support, health care, and preventative health. However, to implement truly integrated care, greater institutional commitment, time and leadership are needed.

1. Roos LL, Wall-Wieler E, Lee JB. Poverty and Early Childhood Outcomes. *Pediatrics*. 2019.
2. Bonevski B, Randell M, Paul C, Chapman K, Twyman L, Bryant J, et al. Reaching the hard-to-reach: a systematic review of strategies for improving health and medical research with socially disadvantaged groups. *BMC medical research methodology*. 2014;14(1):1-29.
3. Research NIfH. Improving inclusion of under-served groups in clinical research: Guidance from the NIHR INCLUDE project. 2020.
4. Chopra M, Sharkey A, Dalmiya N, Anthony D, Binkin N, Unicef Equity in Child Survival H, et al. Strategies to improve health coverage and narrow the equity gap in child survival, health, and nutrition. *Lancet*. 2012;380(9850):1331-40.
5. Halfon N, Russ SA, Kahn RS. Inequality and child health: dynamic population health interventions. *Curr Opin Pediatr*. 2022;34(1):33-8.
6. WHO statement-by-the-malaria-policy-advisory-group-on-the-urgent-need-to-address-the-high-prevalence-of-pfhrp2-3-gene-deletions-in-the-horn-of-africa-and-beyond.
7. Gilliland JA, Shah TI, Clark A, Sibbald S, Seabrook JA. A geospatial approach to understanding inequalities in accessibility to primary care among vulnerable populations. *PLoS One*. 2019;14(1):e0210113.
8. Marmot M. Health equity in England: the Marmot review 10 years on. *Bmj*. 2020;368.
9. Dahlgren G, Whitehead M. The Dahlgren-Whitehead model of health determinants: 30 years on and still chasing rainbows. *Public health*. 2021;199:20-4.
10. Nandyal S, Strawhun D, Stephen H, Banks A, Skinner D. Building trust in American hospital-community development projects: a scoping review. *Journal of community hospital internal medicine perspectives*. 2021;11(4):439-45.
11. Alley DE, Asomugha CN, Conway PH, Sanghavi DM. Accountable health communities—addressing social needs through Medicare and Medicaid. *New England Journal of Medicine*. 2016;374(1):8-11.
12. Anderson M, Pitchforth E, Edwards N, Alderwick H, McGuire A, Mossialos E. United Kingdom: health system review. 2022.
13. Purcal C, , Muir K, , Patulny R, , et al. Does partnership funding improve coordination and collaboration among early childhood services? - Experiences from the Communities for Children programme. 2011;16:474-84.
14. Saxe-Custack A, , Lofton HC, , Hanna-Attisha M, , et al. Caregiver perceptions of a fruit and vegetable prescription programme for low-income paediatric patients. 2018;21:2497-506.
15. Murillo SN, , Rosenthal A, , Fenick AM, , et al. The Impact of a Pediatric Medical-Legal Partnership on Pediatric Providers: A Qualitative Study. 2022;22:447-53.
16. Martinussen M, , Kaiser S, , Adolfsen F, , et al. Reorganisation of healthcare services for children and families: Improving collaboration, service quality, and worker well-being. 2017;31:487-96.
17. Toh CH, Haynes R. The Health and Care Act 2022: challenges and priorities for embedding research in the NHS. *The Lancet*. 2022;400(10349):343-5.
18. Health Do, Care S. Integration and Innovation: working together to improve health and social care for all. The Department of Health and Social Care's legislative proposals for a Health and Care Bill: Department of Health and Social Care; 2021.
19. NHS England, . The NHS Long Term Plan. 2019.
20. Anderson M, , Pitchforth E, , Asaria M, , et al. LSE–Lancet Commission on the future of the NHS: re-laying the foundations for an equitable and efficient health and care service after COVID-19. 2021;397:1915-78.
21. Curry N, Harris M, Gunn LH, Pappas Y, Blunt I, Soljak M, et al. Integrated care pilot in north-west London: a mixed methods evaluation. *Int J Integr Care*. 2013;13:e027.

22. Belsky J, Melhuish E, Barnes J, et al. Effects of Sure Start local programmes on children and families: early findings from a quasi-experimental, cross sectional study. 2006;332:1476.
23. Wolfe I, Satherley RM, Scotney E, Newham J, Lingam R. Integrated Care Models and Child Health: A Meta-analysis. *Pediatrics*. 2020;145(1).
24. Satherley RM, Lingam R, Green J, Wolfe I. Integrated health Services for Children: a qualitative study of family perspectives. *BMC Health Serv Res*. 2021;21(1):167.
25. Jayaratne K, Kelaher M, Dunt D. Child Health Partnerships: a review of program characteristics, outcomes and their relationship. *BMC Health Serv Res*. 2010;10:172.
26. S T, E D, T M, . Evaluating early help: a guide to evaluation of complex local early help systems. 2019.
27. Garg P, Eastwood J, Liaw ST. A Realist Synthesis of Literature Informing Programme Theories for Well Child Care in Primary Health Systems of Developed Economies. *Int J Integr Care*. 2019;19(3):5.
28. Bonciani M, Schäfer W, Barsanti S, Heinemann S, Groenewegen P. The benefits of co-location in primary care practices: the perspectives of general practitioners and patients in 34 countries. *BMC health services research*. 2018;18(1):1-22.
29. Baxter S, Johnson M, Chambers D, et al. The effects of integrated care: a systematic review of UK and international evidence. 2018;18:350.
30. Coughlan CH, Ruzangi J, Neale FK, et al. Social and ethnic group differences in healthcare use by children aged 0–14 years: a population-based cohort study in England from 2007 to 2017. 2022;107:32-9.
31. Alderwick H, Hutchings A, Briggs A, Mays N. The impacts of collaboration between local health care and non-health care organizations and factors shaping how they work: a systematic review of reviews. *BMC Public Health*. 2021;21:1-16.
32. Smith K, Bambra C, Joyce K, Perkins N, Hunter DJ, Blenkinsopp E. Partners in health? A systematic review of the impact of organizational partnerships on public health outcomes in England between 1997 and 2008. *Journal of public health*. 2009;31(2):210-21.
33. Organization WH. Framework for action on interprofessional education & collaborative practice. Geneva: WHO; 2010.[Internet]. 2010 [cited Jun/Jul 1, 2018]. 2010.
34. Leijten FR, Struckmann V, van Ginneken E, Czypionka T, Kraus M, Reiss M, et al. The SELFIE framework for integrated care for multi-morbidity: development and description. *Health policy*. 2018;122(1):12-22.
35. Council BC. Birmingham Health profiles: Hall Green Constituency. 2019.
36. Quinn LM, Narendran P, Bhavra K, Boardman F, Greenfield SM, Randell MJ, et al. Developing a General Population Screening Programme for Paediatric Type 1 Diabetes: Evidence from a Qualitative Study of the Perspectives and Attitudes of Parents. *Pediatric Diabetes*. 2024;2024:9927027.
37. Elo S, Kyngäs H. The qualitative content analysis process. *Journal of advanced nursing*. 2008;62(1):107-15.
38. Assarroudi A, Heshmati Nabavi F, Armat MR, Ebadi A, Vaismoradi M. Directed qualitative content analysis: the description and elaboration of its underpinning methods and data analysis process. *Journal of research in nursing*. 2018;23(1):42-55.
39. Henderson L, Bain H, Allan E, Kennedy C. Integrated health and social care in the community: A critical integrative review of the experiences and well-being needs of service users and their families. *Health & social care in the community*. 2021;29(4):1145-68.
40. Henderson L, Bain H, Allan E, Kennedy C. An Exploratory Multi-Case Study of the Health and Wellbeing Needs, Relationships and Experiences of Health and Social Care Service Users and the People who Support them at Home. *Int J Integr Care*. 2023;23(1):11.
41. (UK) Dohasc. The Care Act. 2014.
42. Berry LL, Awdish RL, Letchuman S, Steffensen KD, editors. Trust-based partnerships are essential—and achievable—in health care service. *Mayo Clinic Proceedings*; 2021: Elsevier.

43. Webb Hooper M, Mitchell C, Marshall VJ, Cheatham C, Austin K, Sanders K, et al. Responding to healthcare distrust among underserved communities: phase II. Wiley Online Library; 2022. p. 3-8.
44. Wiseman T. A concept analysis of empathy. *Journal of advanced nursing*. 1996;23(6):1162-7.
45. Jones J, Barry MM. Factors influencing trust and mistrust in health promotion partnerships. *Global health promotion*. 2018;25(2):16-24.
46. Organization WH. Health promotion glossary of terms 2021. 2021.
47. Ravaghi H, Guisset A-L, Elfeky S, Nasir N, Khani S, Ahmadnezhad E, et al. A scoping review of community health needs and assets assessment: concepts, rationale, tools and uses. *BMC health services research*. 2023;23(1):44.
48. Bantham A, Taverno Ross SE, Sebastião E, Hall G. Overcoming barriers to physical activity in underserved populations. *Progress in Cardiovascular Diseases*. 2021;64:64-71.
49. Douglas F, Torrance N, van Teijlingen E, Meloni S, Kerr A. Primary care staff's views and experiences related to routinely advising patients about physical activity. A questionnaire survey. *BMC public health*. 2006;6:1-10.
50. Laws RA, Kemp LA, Harris MF, Davies GP, Williams AM, Eames-Brown R. An exploration of how clinician attitudes and beliefs influence the implementation of lifestyle risk factor management in primary healthcare: a grounded theory study. *Implementation Science*. 2009;4:1-15.
51. Iacobucci G. Children's oral health is "national disgrace," says head of royal college. *British Medical Journal Publishing Group*; 2023.
52. Northridge ME, Kumar A, Kaur R. Disparities in Access to Oral Health Care. *Annual Review of Public Health*. 2020;41(Volume 41, 2020):513-35.
53. Karamat A. Enhancing Scotland's Childsmile programme through Community Linking to address child oral health inequalities: University of Glasgow; 2023.
54. Saccomanno S, De Luca M, Saran S, Petricca MT, Caramaschi E, Mastrapasqua RF, et al. The importance of promoting oral health in schools: a pilot study. *European Journal of Translational Myology*. 2023;33(1).
55. Torres-Ruiz M, Robinson-Ector K, Atkinson D, Trotter J, Anise A, Clauser S. A portfolio analysis of culturally tailored trials to address health and healthcare disparities. *International journal of environmental research and public health*. 2018;15(9):1859.
56. Sidhu MS, Gale NK, Gill P, Marshall T, Jolly K. A critique of the design, implementation, and delivery of a culturally-tailored self-management education intervention: a qualitative evaluation. *BMC Health Services Research*. 2015;15(1):54.
57. Greenhalgh T, Heath I. *Measuring quality in the therapeutic relationship*. London: The Kings Fund. 2010.
58. Soklaridis PhD S, Adler Nevo MD FRCPC G, PRCPC LM. Relationship-centred care in health: A 20-year scoping review. *Patient Experience Journal*. 2016;3(1):130-45.
59. Rawlinson C, Carron T, Cohidon C, Arditi C, Hong QN, Pluye P, et al. An Overview of Reviews on Interprofessional Collaboration in Primary Care: Barriers and Facilitators. *Int J Integr Care*. 2021;21(2):32.
60. Alderwick H, Hutchings A, Mays N. A cure for everything and nothing? Local partnerships for improving health in England. *bmj*. 2022;378.
61. Mick SSF, Shay PD. Accountable care organizations and transaction cost economics. *Medical Care Research and Review*. 2016;73(6):649-59.
62. Beck AF, Cohen AJ, Colvin JD, Fichtenberg CM, Fleegler EW, Garg A, et al. Perspectives from the Society for Pediatric Research: interventions targeting social needs in pediatric clinical care. *Pediatric research*. 2018;84(1):10-21.
63. LaForge K, Gold R, Cottrell E, Bunce AE, Proser M, Hollombe C, et al. How 6 organizations developed tools and processes for social determinants of health screening in primary care: an overview. *The Journal of ambulatory care management*. 2018;41(1):2-14.
64. NHSE. Group consultations: Together, patients are stronger 2023 [Available from: <https://www.england.nhs.uk/gp/case-studies/group-consultations-together-patients-are->

[stronger/#:~:text=Although%20much%20more%20work%20is,of%20working%20as%20team%20with.](#)

65. Education Df. Supporting pupils at school with medical conditions. Crown Copyright London; 2015.
66. Education Df. Statutory framework for the early years foundation stage: Setting the standards for learning, development and care for children from birth to five: Department for Education; 2012.
67. Pearson M, Chilton R, Wyatt K, Abraham C, Ford T, Woods HB, et al. Implementing health promotion programmes in schools: a realist systematic review of research and experience in the United Kingdom. *Implementation Science*. 2015;10:1-20.
68. Musgrave J, Levy R. Including children with chronic health conditions in early childhood education and care settings. *Journal of early childhood research*. 2020;18(2):159-73.
69. Langford R, Campbell R, Magnus D, Bonell C, Murphy S, Waters E, et al. The WHO health promoting school framework for improving the health and well-being of students and staff [protocol]. *Cochrane Database of Systematic Reviews*. 2011.
70. Itriyeva K. Improving Health Equity and Outcomes for Children and Adolescents: The Role of School-Based Health Centers (SBHCs). *Current Problems in Pediatric and Adolescent Health Care*. 2024;54(4):101582.
71. Bear L, Finer R, Guo S, Lau AS. Building the gateway to success: an appraisal of progress in reaching underserved families and reducing racial disparities in school-based mental health. *Psychological services*. 2014;11(4):388.
72. Tang AN, Ho PW. Healthy schools and safe cities movement. *The Routledge Handbook of Public Health and the Community*; Routledge; 2021. p. 233-41.
73. Benes S, Boyd KM, Cucina I, Alperin HL. School-based health education research: charting the course for the future. *Research Quarterly for Exercise and Sport*. 2021;92(1):111-26.
74. Santos F, Sousa H, Gouveia ER, Lopes H, Peralta M, Martins J, et al. School-based family-oriented health interventions to promote physical activity in children and adolescents: a systematic review. *American Journal of Health Promotion*. 2023;37(2):243-62.
75. Elsadek YE, Baker SR. Oral health promotion through health-promoting schools in developing countries: A scoping review. *Community Dentistry and Oral Epidemiology*. 2023;51(6):1197-208.
76. England N. Working in partnership with people and communities: statutory guidance. *Care DoHS*. 2022.
77. England N, Association LG. Thriving places: guidance on the development of place-based partnerships as part of statutory integrated care systems. 2021.
78. Turk E, Durrance-Bagale A, Han E, Bell S, Rajan S, Lota MMM, et al. International experiences with co-production and people centredness offer lessons for covid-19 responses. *bmj*. 2021;372.
79. Farr M, Davies P, Andrews H, Bagnall D, Brangan E, Davies R. Co-producing knowledge in health and social care research: reflections on the challenges and ways to enable more equal relationships. *Humanities and Social Sciences Communications*. 2021;8(1).
80. Wesson DE, Kitzman HE. How academic health systems can achieve population health in vulnerable populations through value-based care: the critical importance of establishing trusted agency. *Academic Medicine*. 2018;93(6):839-42.
81. Cutts T, Gunderson G, Carter D, Childers M, Long P, Marisiddaiah L, et al. From the Memphis model to the North Carolina way: lessons learned from emerging health system and faith community partnerships. *North Carolina Medical Journal*. 2017;78(4):267-72.
82. Pujalte GGA, Pantin SA, Waller TA, Maruoka Nishi LY, Willis FB, Jethwa TP, et al. Patient-Centered Medical Home With Colocation: Observations and Insights From an Academic Family Medicine Clinic. *J Prim Care Community Health*. 2020;11:2150132720902560.
83. Gharaveis A, Hamilton DK, Pati D. The impact of environmental design on teamwork and communication in healthcare facilities: a systematic literature review. *HERD: Health Environments Research & Design Journal*. 2018;11(1):119-37.

84. Pelone F, Harrison R, Goldman J, Zwarenstein M. Interprofessional collaboration to improve professional practice and healthcare outcomes. *Cochrane database of systematic reviews*. 2017(6).
85. Wranik WD, Price S, Haydt SM, Edwards J, Hatfield K, Weir J, et al. Implications of interprofessional primary care team characteristics for health services and patient health outcomes: a systematic review with narrative synthesis. *Health Policy*. 2019;123(6):550-63.
86. Bodenheimer T, Sinsky C. From triple to quadruple aim: care of the patient requires care of the provider. *The Annals of Family Medicine*. 2014;12(6):573-6.
87. Lalani M, Marshall M. Co-location, an enabler for service integration? Lessons from an evaluation of integrated community care teams in East London. *Health & Social Care in the Community*. 2022;30(2):e388-e96.
88. Sanderson M, Allen P, Osipovic D, Petsoulas C, Boiko O, Lorne C. Developing architecture of system management in the English NHS: evidence from a qualitative study of three Integrated Care Systems. *BMJ open*. 2023;13(2):e065993.
89. Charlesworth A, Anderson M, Donaldson C, Johnson P, Knapp M, McGuire A, et al. What is the right level of spending needed for health and care in the UK? *The Lancet*. 2021;397(10288):2012-22.
90. Lian T, Kutzer K, Gautam D, Eisenson H, Crowder JC, Esmaili E, et al. Factors Associated with Patients' Connection to Referred Social Needs Resources at a Federally Qualified Health Center. *J Prim Care Community Health*. 2021;12:21501327211024390.
91. Gottlieb LM, Wing H, Adler NE. A systematic review of interventions on patients' social and economic needs. *American journal of preventive medicine*. 2017;53(5):719-29.
92. Mircea R, Saplacan G, Sebestyen G, Todor N, Krucz L, Lelutiu C. eHealth: towards a healthcare service-oriented boundary-less infrastructure. *Applied Medical Informatics*. 2010;27(3):1-14.
93. Sandhu S, Lian T, Smeltz L, Drake C, Eisenson H, Bettger JP. Patient barriers to accessing referred resources for unmet social needs. *The Journal of the American Board of Family Medicine*. 2022;35(4):793-802.
94. Schweitzer A, Mohta NS. Pathways to success in meeting health-related social needs. *NEJM Catalyst Innovations in Care Delivery*. 2023;4(4):CAT. 22.0352.
95. Eccles A, Bryce C, Driessen A, Pope C, MacLellan J, Gronlund TAC, et al. Evidence for access: systematic scoping review of access systems in general practice. *British Journal of General Practice*. 2024.
96. Fiori KP, Rehm CD, Sanderson D, Braganza S, Parsons A, Chodon T, et al. Integrating social needs screening and community health workers in primary care: the community linkage to care program. *Clinical pediatrics*. 2020;59(6):547-56.
97. P. Iqbal M, Walpola R, Harris-Roxas B, Li J, Mears S, Hall J, et al. Improving primary health care quality for refugees and asylum seekers: A systematic review of interventional approaches. *Health Expectations*. 2022;25(5):2065-94.
98. Phung V-H, Asghar Z, Matiti M, Siriwardena AN. Understanding how Eastern European migrants use and experience UK health services: a systematic scoping review. *BMC Health Services Research*. 2020;20:1-10.
99. Boylen S, Cherian S, Gill FJ, Leslie GD, Wilson S. Impact of professional interpreters on outcomes for hospitalized children from migrant and refugee families with limited English proficiency: a systematic review. *JBIC evidence synthesis*. 2020;18(7):1360-88.
100. England N, Commissioning PC. Guidance for commissioners: interpreting and translation Services in Primary Care. 2018.
101. Hilder J, Gray B, Stubbe M. Health navigation and interpreting services for patients with limited English proficiency: a narrative literature review. *Journal of Primary Health Care*. 2019;11(3):217-26.
102. Romney AK, Weller SC, Batchelder WH. Culture as consensus: A theory of culture and informant accuracy. *American anthropologist*. 1986;88(2):313-38.
